# Supplementary material
Source: MDPI journal article supplement (https://www.mdpi.com/2227-7390/9/22/2911)
Supplement: s1 [file s1]

## Supplementary

**Table S1** – Dependence of the wave rotation period on the perimeter of the gray zone at different space step. SR – Scar Rotation Regime, GZR – Gray Zone Rotation Regime, SR2 – Scar Rotation Two Regime.

|                   |               |     |     |     |     |     |
|-------------------|---------------|-----|-----|-----|-----|-----|
| Space step - 0,45 | Perimeter, mm | 138 | 195 | 251 | 308 |     |
|                   | Period,ms     | 306 | 383 | 449 | 469 |     |
|                   | Regime        | SR  | GZR | GZR | SR2 |     |
| Space step - 0,28 | Perimeter,mm  | 140 | 193 | 246 | 299 | 316 |
|                   | Period,ms     | 292 | 361 | 413 | 472 | 478 |
|                   | Regime        | SR  | GZR | GZR | SR2 | SR2 |

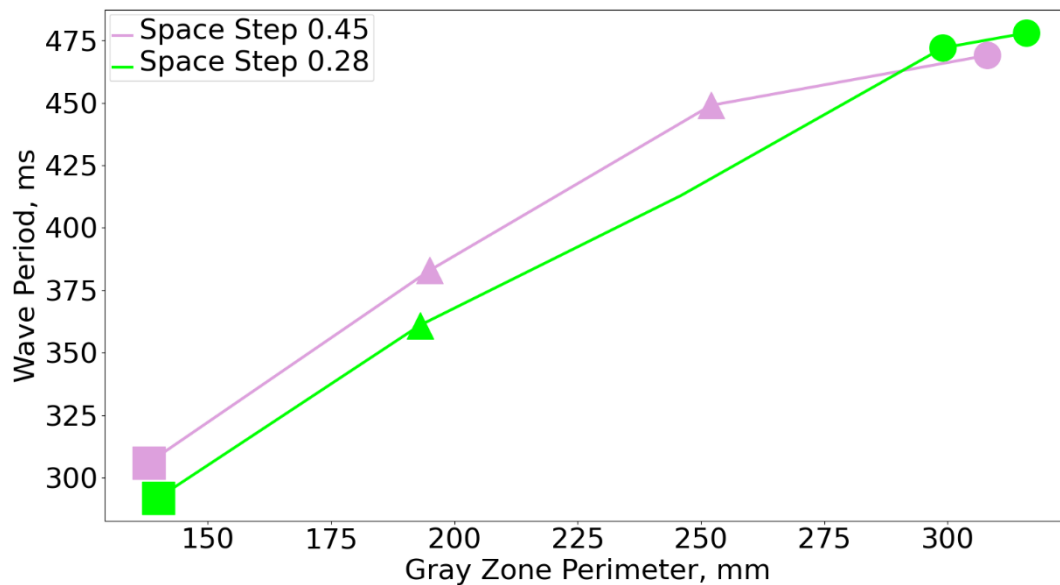

**Figure S1** - Dependence of the wave rotation period on the perimeter of gray zone at different space step. A triangle indicates gray zone rotation, a square indicates scar rotation, and a circle indicates scar rotation two.
